# Supplementary material
Source: Royal Society of Chemistry journal article supplement (doi:10.1039/d6ta01785a)
Supplement: d6ta01785a1.pdf [file d6ta01785a1.pdf]

# **Review of CO<sub>2</sub> reduction photocatalysts with a sustainability perspective**

## Supplementary Information

*Pınar Özdemir<sup>a</sup>, Beyza Yılmaz<sup>a</sup>, and Ramazan Yıldırım\**

Department of Chemical Engineering, Boğaziçi University, 34342, Bebek-Istanbul,  
Turkey

\*Corresponding author email: [yildirra@boun.edu.tr](mailto:yildirra@boun.edu.tr)

## S1. Color Codes and Categorization Methodology

Table S1 was created based on five categorical levels. Even if descriptions of these levels can change according to column topic, they have same metrics tendency. If positive metrics are represented by green scale and risk metrics are colored by reversed scale.

Here is the general color scale applied on all columns of tables for major semiconductors and co-catalysts assessment.

**Table S1.** Color legend for categorization of semiconductors and co-catalysts.

| Color         | Level     | Meaning                            |
|---------------|-----------|------------------------------------|
| ■ Dark green  | Very low  | Sustainable / Low risk             |
| ■ Light green | Low       | Positive                           |
| ■ Yellow      | Moderate  | Moderate                           |
| ■ Orange      | High      | Increasing risk                    |
| ■ Red         | Very high | Critical / Negative/ Low stability |

In addition to color codes of Table S1, each column of Table S11 and S21 was scaled by a simple criterionization based on their topic. These were clarified below step by step for each table.

## S2. Clarification for Table of Major Semiconductors Assessment

### S2.1. Abundance

Abundance column was totally scaled and filled based on information of EU critical raw material report<sup>1</sup>. Elemental composition and global supply/production level were taken into consideration, and a logical scale was defined as given in Table S2.

**Table S2.** Colored logic scale for abundance column.

| Color         | Level     | Meaning                                                                                                      |
|---------------|-----------|--------------------------------------------------------------------------------------------------------------|
| ■ Dark green  | Very high | Abundant and common element base like metal-free or oxide minerals                                           |
| ■ Light green | High      | Non-critical metal but not unlimited like Zn, S                                                              |
| ■ Yellow      | Moderate  | Limited access by regulation/byproduct production like Pb-containing perovskite or systems dependent on CRMs |
| ■ Orange      | Low       | Materials are non-toxic but consist of CRMs                                                                  |
| ■ Red         | Very low  | Toxic and CRMs                                                                                               |

### S2.2. Industrial maturity

Industrial maturity column was compiled from the literature survey. The starting point of the logical scale has been defined based on whether it is industrial production or laboratory scale (as shown in Table S3).

**Table S3.** Colored logic scale for industrial maturity.

| Color | Level | Meaning |
|-------|-------|---------|
|-------|-------|---------|

|               |           |                                       |
|---------------|-----------|---------------------------------------|
| ■ Dark green  | Very high | Bulk chemical industry                |
| ■ Light green | High      | Industrial precursor + scalable oxide |
| ■ Yellow      | Moderate  | Semi-industrial synthesis             |
| ■ Orange      | Low       | Still evolving                        |
| ■ Red         | Very low  | Unique or rare production routes      |

### S2.3. Process complexity

Process complexity column was filled according to production methods/steps, if there is multi-step, redox control or heterostructure. The complexity of synthesis routes was scaled and defined as shown in Table S4.

**Table S4.** Colored logic scale for process complexity.

| Color         | Level     | Meaning                                         |
|---------------|-----------|-------------------------------------------------|
| ■ Dark green  | Very low  | Direct utilization                              |
| ■ Light green | Low       | Single step or calcination                      |
| ■ Yellow      | Moderate  | Morphology tuning                               |
| ■ Orange      | High      | Oxidation-state control or aggressive chemistry |
| ■ Red         | Very high | Multiple step + modifications                   |

### S2.4. Supply risk (from EU critical raw material report)

EU critical raw materials report gave a threshold value for supply risk ( $SR \geq 1.0$ )<sup>1</sup>. If SR values of a material are equal or higher than 1.0, it is accepted critical in terms of supply risk. In the light of threshold value of EU report, SR column was filled according to SR value of each semiconductor or components. The supply risk of semiconductors was scaled and defined as shown in Table S5.

**Table S5.** Colored logic scale for supply risk.

| Color         | Level     | Meaning                                                                        |
|---------------|-----------|--------------------------------------------------------------------------------|
| ■ Dark green  | Very low  | EU non-critical ones like g-C <sub>3</sub> N <sub>4</sub> metal-free or Ti, Zn |
| ■ Light green | Low       | EU non-critical and produced ones from abundant components like r-GO and GO    |
| ■ Yellow      | Moderate  | EU non-critical but strategic/demanded ones like Cu                            |
| ■ Orange      | High      | EU critical and regulatory restricted ones like Cd, Pb                         |
| ■ Red         | Very high | EU critical and non-environmentally ones                                       |

### S2.5. Energy intensity

Energy intensity column was filled according to energy requirements of synthesis routes such as calcination/reduction temperature or hotspots of LCA. The energy intensity of synthesis routes was scaled and defined as shown in Table S6.

**Table S6.** Colored logic scale for energy intensity.

| Color         | Level    | Meaning                           |
|---------------|----------|-----------------------------------|
| ■ Dark green  | Very low | Direct utilization or single step |
| ■ Light green | Low      | single step + calcination         |

|          |           |                                                                                |
|----------|-----------|--------------------------------------------------------------------------------|
| ■ Yellow | Moderate  | morphology tuning/drying/thermal treatment but limited energy input            |
| ■ Orange | High      | oxidation-state control/high temperature/long duration/multiple post-treatment |
| ■ Red    | Very high | Aggressive and non-environmentally chemistry                                   |

## S2.6. Water consumption

Water consumption column was scaled according to washing cycles, acidic oxidations, and solution synthesis of semiconductors. The water consumption of semiconductors was scaled and defined as shown in Table S7.

**Table S7.** Colored logic scale for water consumption.

| Color         | Level     | Meaning                                                             |
|---------------|-----------|---------------------------------------------------------------------|
| ■ Dark green  | Very low  | Mostly dry synthesis                                                |
| ■ Light green | Low       | Solvent-free or minimum washing cycles                              |
| ■ Yellow      | Moderate  | Morphology tuning/drying/thermal treatment but limited energy input |
| ■ Orange      | High      | Solvent-added synthesis + washing                                   |
| ■ Red         | Very high | Intensive washing/purification or solvent separation chain          |

## S2.7. Human/environmental toxicity

Human/environmental toxicity column was scaled according to environmental risk severity rather than intrinsic material toxicity. Human/environmental toxicity of semiconductors was scaled and defined as shown in Table S8.

**Table S8.** Colored logic scale for human/environmental toxicity.

| Color         | Level     | Meaning                               |
|---------------|-----------|---------------------------------------|
| ■ Dark green  | Very low  | Metal-free                            |
| ■ Light green | Low       | Inert oxides                          |
| ■ Yellow      | Moderate  | Ion dissolution possible ones         |
| ■ Orange      | High      | Restricted toxicity                   |
| ■ Red         | Very high | Strongly toxic or hazardous chemistry |

## S2.8. CO<sub>2</sub> reduction performance

PCCO<sub>2</sub>R performance column was scaled according to found maximum yields and visible-light capability of semiconductors. Here two highest yields are just selected: one for liquid and another for gaseous phase. If the products have just yield of just gas or liquid phases, the two highest yields from same phase were selected for each semiconductor. PCCO<sub>2</sub>R performance of semiconductors was scaled and defined as shown in Table S9.

**Table S9.** Colored logic scale for PCCO<sub>2</sub>R performance.

| Color         | Level     | Meaning                                               |
|---------------|-----------|-------------------------------------------------------|
| ■ Dark green  | Very high | Highest yields + visible light-driven                 |
| ■ Light green | High      | Highest yields + UV light-driven                      |
| ■ Yellow      | Moderate  | Modest yields among them + variable light irradiation |

|          |          |                                                      |
|----------|----------|------------------------------------------------------|
| ■ Orange | Low      | Lower yields among them + variable light irradiation |
| ■ Red    | Very low | Lowest yields among them + UV light irradiation      |

## S2.9. Overall sustainability

The overall stability column is a combination of abundance, industrial maturity, supply risk, energy intensity, toxicity, water consumption, and stability limitations for each semiconductor. Overall stability of semiconductors was scaled and defined as shown in Table S10.

**Table S10.** Colored logic scale for overall stability.

| Color         | Level     | Meaning                                                  |
|---------------|-----------|----------------------------------------------------------|
| ■ Dark green  | Very high | High performance + lowest toxicity                       |
| ■ Light green | High      | High performance + lowest toxicity but high energy input |
| ■ Yellow      | Moderate  | Efficient but unstable/footprint issue/UV active         |
| ■ Orange      | Low       | Efficient but consist of critical raw material           |
| ■ Red         | Very low  | High toxicity (in)dependent of performance               |

**Table S11.** Assessment of major semiconductors used in the photocatalytic CO<sub>2</sub> reduction process

| Material                        | Abundance                             | Industrial maturity                                               | Process complexity                                 | Supply risk (EU) <sup>1</sup>                 | Energy intensity (relative)                                   | Water consumption                                           | Human/environmental toxicity                               | PCCO <sub>2</sub> R performance*                                                                                                           | Overall sustainability                        |
|---------------------------------|---------------------------------------|-------------------------------------------------------------------|----------------------------------------------------|-----------------------------------------------|---------------------------------------------------------------|-------------------------------------------------------------|------------------------------------------------------------|--------------------------------------------------------------------------------------------------------------------------------------------|-----------------------------------------------|
|                                 |                                       |                                                                   |                                                    |                                               |                                                               |                                                             |                                                            |                                                                                                                                            |                                               |
| g-C <sub>3</sub> N <sub>4</sub> | ■ Very high - C, N ubiquitous         | ■ Moderate - thermal polymerization (urea, melamine) <sup>2</sup> | ■ Low - simple-batch calcination                   | ■ Very low - EU non-critical                  | ■ Moderate - 500-600 °C calcination hotpot <sup>3</sup>       | ■ Low - mostly solvent-free <sup>3</sup>                    | ■ Very low - metal-free                                    | ■ High - Moderate - CO 883 <sup>4</sup> ; HCOOH 5069 <sup>5</sup> μmolg <sup>-1</sup> cat.h <sup>-1</sup>                                  | ■ Very high - metal-free and low toxicity     |
| TiO <sub>2</sub>                | ■ Very high - oxide minerals abundant | ■ Very high - sulfate/chloride industry <sup>6</sup>              | ■ Low - mature scalable                            | ■ Very low - EU non-critical                  | ■ High - industrial calcination <sup>7</sup>                  | ■ Moderate - wet processing <sup>8</sup>                    | ■ Low - inert oxide                                        | ■ High - CO 1223 <sup>9</sup> ; CH <sub>4</sub> 1290 <sup>10</sup> μmolg <sup>-1</sup> cat.h <sup>-1</sup> (UV)                            | ■ High - industrially robust but energy heavy |
| Cu <sub>2</sub> O/CuO           | ■ Very high - Cu abundant             | ■ High - oxidation/precipitation <sup>11,12</sup>                 | ■ High - multi-step redox control needed           | ■ Moderate - non-critical but strategic metal | ■ High - post-treatment/calcination <sup>13</sup>             | ■ Moderate - washing cycles <sup>14</sup>                   | ■ Moderate - Cu <sup>+</sup> /Cu <sup>2+</sup> ion release | ■ High - CH <sub>3</sub> OH 1.2 molg <sup>-1</sup> cat.h <sup>-115</sup> ; CH <sub>4</sub> 14.93 mmolg <sup>-1</sup> cat.h <sup>-116</sup> | ■ Moderate - active but stability-limited     |
| ZnO                             | ■ High - Zn widely mined              | ■ High - precipitation/hydrothermal <sup>17</sup>                 | ■ Moderate - morphology control                    | ■ Low - EU non-critical                       | ■ Moderate - calcination/heating <sup>18</sup>                | ■ Moderate - solution washing <sup>19</sup>                 | ■ Moderate - Zn <sup>2+</sup> ecotoxicity via dissolution  | ■ Very high - CH <sub>3</sub> OH 6700 <sup>20</sup> ; CO 3814 <sup>21</sup> μmolg <sup>-1</sup> cat.h <sup>-1</sup>                        | ■ Moderate - High - efficient yet unstable    |
| r-GO/GO                         | ■ High - graphite-derived             | ■ Low - oxidation/reduction <sup>22</sup> emerging scale-up       | ■ High - process-dependent (oxidation + reduction) | ■ Low - Moderate - carbon based (no CRM)      | ■ High - oxidation/reduction steps, electricity <sup>23</sup> | ■ Very High - Hummers washing water-intensive <sup>23</sup> | ■ Low - Moderate - nanocarbon ecotox depends on form       | ■ Moderate - CO 760 <sup>24</sup> ; HCOOH 1975 <sup>25</sup> μmolg <sup>-1</sup> cat.h <sup>-1</sup> -interface-dependent                  | ■ Moderate - process footprint dominant       |

|                           |                                                                      |                                                                                  |                                                           |                                                    |                                                                         |                                                                 |                                                                             |                                                                                                                                                                                |                                                             |
|---------------------------|----------------------------------------------------------------------|----------------------------------------------------------------------------------|-----------------------------------------------------------|----------------------------------------------------|-------------------------------------------------------------------------|-----------------------------------------------------------------|-----------------------------------------------------------------------------|--------------------------------------------------------------------------------------------------------------------------------------------------------------------------------|-------------------------------------------------------------|
| <b>CsPbBr<sub>3</sub></b> | ■ <b>Moderate</b> - Cs/Pb/Br available but Pb regulated              | ■ <b>Moderate</b> - Solution-based synthesis common (lab-dominant) <sup>26</sup> | ■ <b>High</b> - solvent-intensive + separations           | ■ <b>High</b> - Pb: regulatory/criticality concern | ■ <b>High</b> - hot-injection (120-180°C) or multi-step <sup>26</sup>   | ■ <b>High</b> - solvent use + purification <sup>27</sup>        | ■ <b>Very high</b> - Pb toxicity/potential Pb <sup>2+</sup> release         | ■ <b>Moderate</b> - CO 401.2 <sup>28</sup> ; CH <sub>4</sub> <sup>29</sup> 230.6 μmolg <sup>-1</sup> cat.h <sup>-1</sup> (visible)                                             | ■ <b>Very low</b> - performance good, toxicity dominates    |
| <b>ZnS</b>                | ■ <b>High</b> - Zn non-critical + S abundant by-product              | ■ <b>High</b> - Coprecipitation/hydrothermal established <sup>30</sup>           | ■ <b>Moderate</b> - washing/drying + optional calcination | ■ <b>Low</b> - EU non-critical                     | ■ <b>Moderate</b> - post-treatment energy hotspot <sup>30</sup>         | ■ <b>Moderate</b> - repeated washing <sup>31</sup>              | ■ <b>Moderate</b> - possible Zn <sup>2+</sup> release; S oxidation products | ■ <b>Moderate</b> - CO 2075.7 <sup>32</sup> ; CH <sub>4</sub> 53.72 <sup>33</sup> ; HCOOH 234 <sup>34</sup> μmolg <sup>-1</sup> cat.h <sup>-1</sup> (mostly UV)                | ■ <b>Moderate</b> - safe supply, UV limitation + corrosion  |
| <b>CdS</b>                | ■ <b>Moderate</b> - Cd not scarce but restricted                     | ■ <b>Moderate</b> - lab-scale routes common <sup>35</sup>                        | ■ <b>High</b> - tox-handling + washing + composites       | ■ <b>High</b> - EU: strict regulatory control      | ■ <b>High</b> - upstream Cd refining burdens + processing <sup>36</sup> | ■ <b>High</b> - washing/centrifugation wastewater <sup>36</sup> | ■ <b>Very high</b> - Cd <sup>2+</sup> release + bioaccumulation             | ■ <b>Moderate</b> - CO 2322.8 <sup>37</sup> ; CH <sub>4</sub> 18.53 <sup>38</sup> μmolg <sup>-1</sup> cat.h <sup>-1</sup> (visible)                                            | ■ <b>Very low</b> - toxicity outweighs performance          |
| <b>BiVO<sub>4</sub></b>   | ■ <b>Moderate</b> - Bi + V from mining/refining (CRM <sup>**</sup> ) | ■ <b>Moderate</b> - common in lab; scale depends on Bi/V <sup>39</sup>           | ■ <b>High</b> - calcination + dopants/heterojunctions     | ■ <b>High</b> - Bi and V listed as critical (EU)   | ■ <b>High</b> - post-calcination energy <sup>40</sup>                   | ■ <b>High</b> - synthesis + washing water use <sup>40</sup>     | ■ <b>Moderate</b> - metal release potential, pH-dependent                   | ■ <b>Low</b> - CO 138.4 <sup>41</sup> ; CH <sub>4</sub> 32.6 <sup>42</sup> ; CH <sub>3</sub> OH 583.35 <sup>43</sup> μmolg <sup>-1</sup> cat.h <sup>-1</sup> (often composite) | ■ <b>Low</b> - CRM risk + processing burden                 |
| <b>BiOX (Cl/Br/I)</b>     | ■ <b>Moderate</b> - Bi critical; halides available                   | ■ <b>Moderate</b> - hydro/solvothermal common <sup>44</sup>                      | ■ <b>Moderate</b> - low-T synthesis but washing/drying    | ■ <b>High</b> - Bi is critical (EU)                | ■ <b>Moderate</b> - reaction low-T, drying energy matters <sup>45</sup> | ■ <b>High</b> - synthesis + washing water use <sup>46</sup>     | ■ <b>Low-Moderate</b> - generally stable; risks more "Bi sourcing"          | ■ <b>Very low</b> - CO 144.5 <sup>47</sup> ; CH <sub>4</sub> 11.93 <sup>48</sup> μmolg <sup>-1</sup> cat.h <sup>-1</sup>                                                       | ■ <b>Low-Moderate</b> - selective but Bi-supply constrained |

\* The two highest yields were represented for liquid and gaseous phases. If the products have just yield of just gas or liquid phases, the two highest yields from same phase were selected for each semiconductors.

\*\* CRM: critical raw materials.

### S3. Clarification for Table of Major Co-catalysts Assessment

#### S3.1. Abundance

Abundance column was totally scaled and filled based on information of EU critical raw material report<sup>1</sup>. Elemental composition and global supply/production level were taken into consideration, and a logical scale was defined as given in Table S12.

**Table S12.** Colored logic scale for abundance column.

| Color         | Level     | Meaning                                    |
|---------------|-----------|--------------------------------------------|
| ■ Dark green  | Very high | Abundant and common element base like Fe   |
| ■ Light green | High      | Earth-abundant metals, large global supply |
| ■ Yellow      | Moderate  | Precious but not extremely scarce          |
| ■ Orange      | Low       | Noble metals with limited reserves         |
| ■ Red         | Very low  | PGM and ultra-rare metals                  |

#### S3.2. Industrial maturity

Industrial maturity column was compiled from the literature survey. The starting point of the logical scale has been defined based on whether it is industrial production or laboratory scale for co-catalyst deposition (as shown in Table S13).

**Table S13.** Colored logic scale for industrial maturity.

| Color         | Level     | Meaning                                         |
|---------------|-----------|-------------------------------------------------|
| ■ Dark green  | Very high | Bulk or established chemical industry           |
| ■ Light green | High      | Industrial production + additional applications |
| ■ Yellow      | Moderate  | Semi-industrial synthesis                       |
| ■ Orange      | Low       | Still evolving                                  |
| ■ Red         | Very low  | Unique or rare production routes                |

#### S3.3. Process complexity

Process complexity column was filled according to production methods/steps, if there is multi-step, extra solvent or post-treatment. The complexity of synthesis routes was scaled and defined as shown in Table S14.

**Table S14.** Colored logic scale for process complexity.

| Color         | Level     | Meaning                                       |
|---------------|-----------|-----------------------------------------------|
| ■ Dark green  | Very low  | Simple impregnation or doping                 |
| ■ Light green | Low       | Combination of two simple synthesizes         |
| ■ Yellow      | Moderate  | Reduction or calcination                      |
| ■ Orange      | High      | Simple modification methods                   |
| ■ Red         | Very high | Molecular complexes or coordination chemistry |

#### S3.4. Supply risk (from EU critical raw material report)

EU critical raw materials report gave a threshold value for supply risk ( $SR \geq 1.0$ )<sup>1</sup>. If SR values of a material are equal or higher than 1.0, it is accepted critical in terms of supply risk. In the light of threshold value of EU report, SR column was filled according to SR value of each semiconductor or components. The supply risk of co-catalyst was scaled and defined as shown in Table S15.

**Table S15.** Colored logic scale for supply risk.

| Color         | Level     | Meaning                                                    |
|---------------|-----------|------------------------------------------------------------|
| ■ Dark green  | Very low  | EU non-critical ones                                       |
| ■ Light green | Low       | EU non-critical and produced ones from abundant components |
| ■ Yellow      | Moderate  | EU non-critical but strategic/demanded ones                |
| ■ Orange      | High      | EU critical and regulatory restricted ones                 |
| ■ Red         | Very high | EU critical and non-environmentally ones                   |

### S3.5. Energy intensity

Energy intensity column was filled according to upstream mining or refining footprint of each co-catalyst. The energy intensity of synthesis routes was scaled and defined as shown in Table S16.

**Table S16.** Colored logic scale for energy intensity.

| Color         | Level     | Meaning                                                             |
|---------------|-----------|---------------------------------------------------------------------|
| ■ Dark green  | Very low  | Abundant metals and no refining burden                              |
| ■ Light green | Low       | Low energy demand                                                   |
| ■ Yellow      | Moderate  | Morphology tuning/drying/thermal treatment but limited energy input |
| ■ Orange      | High      | Extraction/refining energy input                                    |
| ■ Red         | Very high | High extraction/refining energy hotspot                             |

### S3.6. Water consumption

Water consumption column was scaled according to purifications, washing cycles and synthesis solvent of co-catalysts. The water consumption of co-catalyst application was scaled and defined as shown in Table S17.

**Table S17.** Colored logic scale for water consumption.

| Color         | Level     | Meaning                                                             |
|---------------|-----------|---------------------------------------------------------------------|
| ■ Dark green  | Very low  | Simple or mostly dry synthesis                                      |
| ■ Light green | Low       | Solvent-free or minimum washing cycles                              |
| ■ Yellow      | Moderate  | Morphology tuning/drying/thermal treatment but limited energy input |
| ■ Orange      | High      | Solvent-added synthesis + washing                                   |
| ■ Red         | Very high | Intensive washing/purification or solvent separation chain          |

### S3.7. Human/environmental toxicity

Human/environmental toxicity column was scaled according to behavior of nanomaterials, ion release and persistence. Human/environmental toxicity of co-catalysts was scaled and defined as shown in Table S18.

**Table S18.** Colored logic scale for human/environmental toxicity.

| Color         | Level     | Meaning                               |
|---------------|-----------|---------------------------------------|
| ■ Dark green  | Very low  | Metal-free                            |
| ■ Light green | Low       | Inert or benign oxides                |
| ■ Yellow      | Moderate  | Oxidation state changes               |
| ■ Orange      | High      | Ion release and toxicity concerns     |
| ■ Red         | Very high | Strongly toxic or hazardous chemistry |

### S3.8. PCCO<sub>2</sub>R performance

PCCO<sub>2</sub>R performance column was scaled according to found maximum yields and visible-light capability of semiconductors. Here are just selected two highest yields: one for liquid and another for gaseous phase. If the products have just yield of just gas or liquid phases, the two highest yields from same phase were selected for each semiconductor. PCCO<sub>2</sub>R performance of semiconductors was scaled and defined as shown in Table S19.

**Table S19.** Colored logic scale for PCCO<sub>2</sub>R performance.

| Color         | Level     | Meaning                                               |
|---------------|-----------|-------------------------------------------------------|
| ■ Dark green  | Very high | Highest yields + visible light-driven                 |
| ■ Light green | High      | Highest yields + UV light-driven                      |
| ■ Yellow      | Moderate  | Modest yields among them + variable light irradiation |
| ■ Orange      | Low       | Lower yields among them + variable light irradiation  |
| ■ Red         | Very low  | Lowest yields among them + UV light irradiation       |

### S3.9. Overall sustainability

Overall stability column is a combination of abundance, industrial maturity, supply risk, energy intensity, toxicity, water consumption and stability limitation of each semiconductor. Overall stability of semiconductors was scaled and defined as shown in Table S20.

**Table S20.** Colored logic scale for overall stability.

| Color         | Level     | Meaning                                                  |
|---------------|-----------|----------------------------------------------------------|
| ■ Dark green  | Very high | High performance + lowest toxicity or non-critical       |
| ■ Light green | High      | High performance + low toxicity but high energy input    |
| ■ Yellow      | Moderate  | Efficient but unstable/footprint issue or UV active      |
| ■ Orange      | Low       | Efficient/moderate but critical/strategical raw material |
| ■ Red         | Very low  | High toxicity (in)dependent of performance               |

**Table S21.** Assessment of major co-catalysts used in the photocatalytic CO<sub>2</sub> reduction process

| Material                                                                          | Abundance                                                                         | Industrial maturity                                                                  | Process complexity                                                                | Supply risk (EU) <sup>1</sup>                                                     | Energy intensity (relative)                                                         | Water consumption                                                                   | Human/environmental toxicity                                                        | PCCO <sub>2</sub> R performance*                                                                                                   | Overall sustainability                                                              |
|-----------------------------------------------------------------------------------|-----------------------------------------------------------------------------------|--------------------------------------------------------------------------------------|-----------------------------------------------------------------------------------|-----------------------------------------------------------------------------------|-------------------------------------------------------------------------------------|-------------------------------------------------------------------------------------|-------------------------------------------------------------------------------------|------------------------------------------------------------------------------------------------------------------------------------|-------------------------------------------------------------------------------------|
|  |  |     |  |  |  |  |  |                                                 |  |
| <b>Cu</b>                                                                         | ■ <b>High</b> - earth-abundant, large mining base                                 | ■ <b>Very high</b> - photodeposition and impregnation well-established <sup>49</sup> | ■ <b>Moderate</b> - calcination and reduction steps may increase complexity       | ■ <b>Low</b> - EU non-critical, strategic                                         | ■ <b>Moderate</b> - thermal treatments dominate <sup>50</sup>                       | ■ <b>Low</b> - mostly solvent-free <sup>50</sup>                                    | ■ <b>Moderate</b> - oxidation/dissolution under irradiation                         | ■ <b>High</b> - CO 870 <sup>51</sup> ; CH <sub>3</sub> OH 627.66 μmolg <sup>-1</sup> cat.h <sup>-152</sup>                         | ■ <b>High - Moderate</b> - abundant but oxidation-sensitive                         |
| <b>Ag</b>                                                                         | ■ <b>Moderate</b> - precious but accessible                                       | ■ <b>Very high</b> - mature nanoparticle synthesis <sup>53</sup>                     | ■ <b>Moderate</b> - wet-chemical routes with stabilizers                          | ■ <b>Low</b> - EU non-critical                                                    | ■ <b>High</b> - mining and nanoparticle synthesis energy <sup>54</sup>              | ■ <b>Moderate</b> - purification water demand <sup>55</sup>                         | ■ <b>High</b> - Ag <sup>+</sup> release and sulfidation pathways                    | ■ <b>High - Moderate</b> - HCOOH 421 <sup>56</sup> ; CH <sub>4</sub> 113.84 <sup>57</sup> μmolg <sup>-1</sup> cat.h <sup>-1</sup>  | ■ <b>Moderate</b> - performance vs. nano-fate trade-off                             |
| <b>Au</b>                                                                         | ■ <b>Low</b> - scarce noble metal                                                 | ■ <b>Very high</b> - established deposition chemistry <sup>58</sup>                  | ■ <b>Moderate</b> - reductive immobilization and ligand control                   | ■ <b>Moderate</b> - EU non-critical but strategic metal                           | ■ <b>Very high</b> - upstream mining footprint <sup>59</sup>                        | ■ <b>Moderate</b> - purification steps <sup>59</sup>                                | ■ <b>Moderate</b> - chemically inert but persistent                                 | ■ <b>Very high</b> - CO 8982 <sup>60</sup> ; CH <sub>3</sub> OH 232 <sup>20</sup> μmolg <sup>-1</sup> cat.h <sup>-1</sup>          | ■ <b>Low - Moderate</b> - high efficiency, high resource cost                       |
| <b>Pt</b>                                                                         | ■ <b>Very low</b> - PGM** scarcity                                                | ■ <b>Very high</b> - industrial catalytic maturity <sup>61</sup>                     | ■ <b>Moderate</b> - chloroplatinate reduction & dispersion control                | ■ <b>Very high</b> - CRM***                                                       | ■ <b>Very high</b> - extraction/refining energy hotspot <sup>59</sup>               | ■ <b>Moderate</b> - post-treatment washing <sup>59</sup>                            | ■ <b>Moderate</b> - low toxicity but resource-intensive                             | ■ <b>Low</b> - CH <sub>4</sub> 83.6 <sup>62</sup> ; CH <sub>3</sub> OH 17.85 <sup>63</sup> μmolg <sup>-1</sup> cat.h <sup>-1</sup> | ■ <b>Low - Moderate</b> - efficient yet resource-heavy                              |
| <b>Pd</b>                                                                         | ■ <b>Very low</b> - PGM reserves limited                                          | ■ <b>High</b> - mature catalytic processing <sup>64</sup>                            | ■ <b>Moderate</b> - organometallic precursor routes                               | ■ <b>Very high</b> - CRM                                                          | ■ <b>Very high</b> - mining and refining dominant impacts <sup>65</sup>             | ■ <b>Moderate</b> - purification stages <sup>65</sup>                               | ■ <b>High</b> - persistence and possible leaching                                   | ■ <b>Moderate - Low</b> - CO 581.9 <sup>66</sup> ; CH <sub>3</sub> OH 3.17 <sup>67</sup> μmolg <sup>-1</sup> cat.h <sup>-1</sup>   | ■ <b>Low - Moderate</b> - activity vs. scarcity trade-off                           |

|    |                                        |                                                             |                                                         |                                     |                                                     |                                                        |                                                     |                                                                                                                     |                                                    |
|----|----------------------------------------|-------------------------------------------------------------|---------------------------------------------------------|-------------------------------------|-----------------------------------------------------|--------------------------------------------------------|-----------------------------------------------------|---------------------------------------------------------------------------------------------------------------------|----------------------------------------------------|
| Co | ■ Moderate - limited geographic supply | ■ High - industrial alloy/catalyst production <sup>68</sup> | ■ Moderate - calcination and redox treatments           | ■ Very high - CRM                   | ■ High - mining and refining impacts <sup>69</sup>  | ■ Moderate - aqueous processing <sup>70</sup>          | ■ Very high - toxicity and ecological concerns      | ■ High - CO 2075.7 <sup>32</sup> ; CH <sub>4</sub> 20.63 <sup>71</sup> μmolg <sup>-1</sup> cat.h <sup>-1</sup>      | ■ Low - Moderate - catalytic benefits vs. toxicity |
| Ni | ■ High - widely available              | ■ Very high - mature scalable routes <sup>72</sup>          | ■ Very low - simple impregnation/doping                 | ■ Moderate - strategic raw material | ■ Moderate - mining energy demand <sup>72</sup>     | ■ Moderate - washing steps <sup>73</sup>               | ■ High Moderate - soluble Ni species risk           | ■ Moderate - Low CO 599 <sup>74</sup> ; CH <sub>4</sub> 29.65 <sup>75</sup> μmolg <sup>-1</sup> cat.h <sup>-1</sup> | ■ High - Moderate - abundant kinetic modifier      |
| Ru | ■ Very low - rare PGM by-product       | ■ Moderate - limited large-scale deposition <sup>76</sup>   | ■ Moderate - dispersion and oxidation control needed    | ■ Very high - CRM                   | ■ Very high - upstream energy <sup>77</sup>         | ■ Moderate - moderate lab processing <sup>202</sup>    | ■ Moderate - oxidation-state shifts and aggregation | ■ Low - CO 124.8 <sup>78</sup> ; CH <sub>4</sub> 19.8 <sup>78</sup> μmolg <sup>-1</sup> cat.h <sup>-1</sup>         | ■ Very low - scarce despite strong activity        |
| Re | ■ Very low - rarest metals             | ■ Moderate - molecular catalyst handling <sup>79</sup>      | ■ Very high - coordination chemistry and immobilization | ■ Very high - strategic EU material | ■ Very high - high resource intensity <sup>80</sup> | ■ Moderate - solvent-intensive synthesis <sup>80</sup> | ■ Moderate - soluble perrhenate formation           | ■ Low - CO 76.8 <sup>81</sup> ; μmolg <sup>-1</sup> cat.h <sup>-1</sup> (often composite)                           | ■ Very low - scarcity dominates sustainability     |
| Fe | ■ Very high - earth-abundant           | ■ Very high - mature industrial processing <sup>82</sup>    | ■ Very low - simple wet-chemical synthesis              | ■ Very low - EU non-critical        | ■ Moderate - low energy demand <sup>83</sup>        | ■ Low - minimal washing burden <sup>84</sup>           | ■ Low - benign oxide forms                          | ■ Low - CO 122 <sup>85</sup> ; CH <sub>4</sub> 30 <sup>86</sup> μmolg <sup>-1</sup> cat.h <sup>-1</sup>             | ■ High - Moderate - low footprint alternative      |

\* The two highest yields were represented for liquid and gaseous phases. If the products have just yield of just gas or liquid phases, the two highest yields from same phase were selected for each semiconductor.

\*\*PGM: platinum group metal

\*\*\*CRM: critical raw material

## References

- 1 M. Grohol, V. Constanze, GROW DG and European Commision, *Study on the Critical Raw Materials for the EU*, 2023.
- 2 J. Tang, C. Guo, T. Wang, X. Cheng, L. Huo, X. Zhang, C. Huang, Z. Major and Y. Xu, *Carbon Neutralization*, 2024, **3**, 557–583.
- 3 M. Li, L. Yang, Y. Song, H. Hou, Y. Fang, Y. Liu, L. Xie and D. Lu, *Inorganics*, 2025, **13**, 300.
- 4 L. Li, D. Ma, Q. Xu and S. Huang, *Chem. Eng. J.*, 2022, **437**, 135153.
- 5 D. O. Adekoya, M. Tahir and N. A. S. Amin, *J. CO2 Util.*, 2017, **18**, 261–274.
- 6 Y. Dai, H. Dong, L. Sun, J. Li, T. Zhang, Y. Geng and Z. Liu, *Environ. Impact Assess. Rev.*, 2024, **105**, 107412.
- 7 M. del P. Rodríguez-Rojas, V. Bustos-Terrones, M. Y. Díaz-Cárdenas, E. Vázquez-Vélez and H. Martínez, *Sustainability*, 2024, **16**, 7751.
- 8 A. A. Keller, S. McFerran, A. Lazareva and S. Suh, *J. Nanoparticle Res.*, 2013, **15**, 1692.
- 9 J. Y. Do, V. Tamilavan, R. Agneeswari, M. H. Hyun and M. Kang, *J. Photochem. Photobiol. A Chem.*, 2016, **330**, 30–36.
- 10 M. Tahir, *Appl. Catal. B Environ.*, 2017, **219**, 329–343.
- 11 Y. Li, X. Zhang, H. Chen and Y. Li, *Catal. Commun.*, 2015, **66**, 1–5.
- 12 Y. Qu, X. Li, G. Chen, H. Zhang and Y. Chen, *Mater. Lett.*, 2008, **62**, 886–888.
- 13 S. Ali, A. Razzaq, H. Kim and S. Il In, *Chem. Eng. J.*, 2022, **429**, 131579.
- 14 S. Naz, A. Gul and M. Zia, *IET Nanobiotechnology*, 2020, **14**, 1–13.
- 15 Y. A. Wu, I. McNulty, C. Liu, K. C. Lau, Q. Liu, A. P. Paulikas, C.-J. Sun, Z. Cai, J. R. Guest, Y. Ren, V. Stamenkovic, L. A. Curtiss, Y. Liu and T. Rajh, *Nat. Energy*, 2019, **4**, 957–968.
- 16 D. Mateo, J. Albero and H. García, *Energy Environ. Sci.*, 2017, **10**, 2392–2400.
- 17 M. Izzi, M. C. Sportelli, L. Torsi, R. A. Picca and N. Cioffi, *ACS Appl. Nano Mater.*, 2023, **6**, 10881–10902.
- 18 *Int. Students Sci. Congr.*
- 19 B. S. Ramadan, Y. G. Wibowo, D. Anwar and A. T. Maryani, *Glob. NEST J.*, 2024, **26**, 1–18.
- 20 M. Izadpanah Ostad, M. Niknam Shahrak and F. Galli, *J. CO2 Util.*, 2021, **43**, 101373.

- 21 X. Liu, L. Ye, S. Liu, Y. Li and X. Ji, *Sci. Rep.*, 2016, **6**, 38474.
- 22 V. Agarwal and P. B. Zetterlund, *Chem. Eng. J.*, 2021, **405**, 127018.
- 23 V. Tzatzadakis, E. Giannakaki, F. Krasanakis, A. Skouras, A. G. Asimakopoulou, E. Patelarou, K. Chrissopoulou, S. H. Anastasiadis and M. M. Stylianakis, *ACS Omega*, 2026, **11**, 3108–3114.
- 24 Y. Rambabu, U. Kumar, N. Singhal, M. Kaushal, M. Jaiswal, S. L. Jain and S. C. Roy, *Appl. Surf. Sci.*, 2019, **485**, 48–55.
- 25 L. F. Garay-Rodríguez, E. Luévano-Hipólito and L. M. Torres-Martínez, *Mater. Sci. Semicond. Process.*, 2023, **161**, 107458.
- 26 Q. Chen, X. Lan, C. Ren, B. Qi and J. Shi, *J. Alloys Compd.*, 2022, **899**, 163316.
- 27 C. Hiragond, N. Powar and S.-I. In, *Nanomaterials*, 2020, **10**, 2569.
- 28 Z. Chen, Y. Hu, J. Wang, Q. Shen, Y. Zhang, C. Ding, Y. Bai, G. Jiang, Z. Li and N. Gaponik, *Chem. Mater.*, 2020, **32**, 1517–1525.
- 29 R. Das, A. Patra, S. K. Dutta, S. Shyamal and N. Pradhan, *J. Am. Chem. Soc.*, 2022, **144**, 18629–18641.
- 30 Y. Meng, G. Liu, G. Zuo, X. Meng, T. Wang and J. Ye, *Nanoscale*, 2022, **14**, 14455–14465.
- 31 M. M. Khan and K. O. Abdulwahab, *Mater. Sci. Semicond. Process.*, 2024, **181**, 108634.
- 32 J. Liu, M. Liu, S. Zheng, X. Liu, S. Yao, F. Jing and G. Chen, *J. Colloid Interface Sci.*, 2023, **635**, 284–294.
- 33 J. Xue, Z. Wang, Q. Jiang, H. Zhang, H. Guo, P. Liu, A. Zhang, J. Guo and J. Lu, *Mater. Today Chem.*, 2025, **49**, 103064.
- 34 A. R. A. Astuti, W. H. Saputera, D. Ariono, I. G. Wenten and D. Sasongko, *ACS Omega*, 2025, **10**, 5563–5573.
- 35 N. H. S. Suhaimi, J. A. Shah Syed, R. Azhar, N. S. Adzis, O. M. Abdul Halim, Y. H. R. Chang, S. H. Taylor, L. A. Bailey, M. H. Ab Rahim, M. Z. Ramli, W. I. Nawawi and M. A. Mohd Ishak, *Int. J. Hydrogen Energy*, 2025, **165**, 150929.
- 36 A. da Rocha, N. Menguy, C. Yéprémian, A. Couté and R. Brayner, *Nanomaterials*, 2020, **10**, 227.
- 37 R. Xiong, F. Liu, X. Xiao, Y. Xiao, B. Cheng and S. Lei, *Chem. Eng. J.*, 2025, **520**, 166224.
- 38 Afifa, K. Arshad, N. Hussain, M. H. Ashraf and M. Z. Saleem, *Mol. Catal.*, 2025, **576**, 114930.

- 39 M. Ganeshbabu, N. Kannan, P. S. Venkatesh, G. Paulraj, K. Jeganathan and D. MubarakAli, *RSC Adv.*, 2020, **10**, 18315–18322.
- 40 S. H. Chen, Y. S. Jiang and H. Y. Lin, *ACS Omega*, 2020, **5**, 8927–8933.
- 41 Y. Liu, C. Xing, Z. Yao, Q. Deng, T. Liang, S. Zhang, J. Pan, Z. Yu, T. Xie, R. Li and Y. Hou, *J. Colloid Interface Sci.*, 2025, **677**, 1095–1106.
- 42 Y. Wu, Y. Li, K. Zhang, J. Hu and H. Yan, 2025, **51**, 2071–2088.
- 43 P. Chang, H. Yu, Y. Zhang, Y. Gao, L. Zheng, K. Li, Y. Du, L. Wu and J. Liu, *J. Mol. Struct.*, 2025, **1324**, 140914.
- 44 M. Xiao, J. Kong, W. Wang, B. Yang and S. Q. Guo, *J. Alloys Compd.*, 2025, **1046**, 184670.
- 45 R. O. Gembo, R. Ratshiedana, L. M. Madikizela, I. Kamika, C. K. King'onde, A. T. Kuvarega and T. A. M. Msagati, *Catal. Sci. Technol.*, 2024, **14**, 6466–6495.
- 46 Y. Zhang, P. Zhang, Y. Lan, L. Zhang, J. Yan and X. Su, *Chem. Commun.*, 2026, 2877–2895.
- 47 J. Xie, X. Zhang, Z. Lu, J. Hu, A. Hao, Y. Feng and Y. Cao, *Inorg. Chem. Front.*, 2023, **10**, 5127–5135.
- 48 J. Sun, Y. Zhang, S. Fan, X. Li and Q. Zhao, *Appl. Catal. B Environ. Energy*, 2024, **356**, 124248.
- 49 N. Karimah, R. C. Andiani, W. P. Utomo, A. I. Rozafia, N. Farida, A. Rosyidah, R. Liu, Q. Xu and D. Hartanto, *South African J. Chem. Eng.*, 2025, **54**, 582–596.
- 50 J. Zia, S. Radhakrishnan, M. S. S. R. Tejaswini and U. Riaz, *Sustain. Energy Fuels*, , DOI:10.1039/D5SE01290B.
- 51 H. Yin and J. Li, *Appl. Catal. B Environ.*, 2023, **320**, 121927.
- 52 K. Wang, M. Cheng, F. Xia, N. Cao, F. Zhang, W. Ni, X. Yue, K. Yan, Y. He, Y. Shi, W. Dai and P. Xie, *Small*, 2023, **19**, 2207581.
- 53 L. Pourzahedi and M. J. Eckelman, *Environ. Sci. Nano*, 2015, **2**, 361–369.
- 54 M. Slotte and R. Zevenhoven, *J. Clean. Prod.*, 2017, **148**, 948–957.
- 55 Z. Han, H. Y. Teah, I. Hirasawa and Y. Kikuchi, *J. Clean. Prod.*, 2025, **494**, 145012.
- 56 X. Hao, J. Wu, X. Cai, K. Li, C. Song and X. Guo, *Appl. Catal. B Environ. Energy*, 2025, **373**, 125366.
- 57 Y. Ren and W. Li, *Mol. Catal.*, 2024, **562**, 114187.
- 58 X. Chen, C. Li, M. Grätzel, R. Kostecki and S. S. Mao, *Chem. Soc. Rev.*, 2012,

- 41, 7909.
- 59 P. Nuss and M. J. Eckelman, *PLoS One*, 2014, **9**, e101298.
- 60 B. Tahir, M. Tahir and N. S. Amin, *Appl. Surf. Sci.*, 2015, **338**, 1–14.
- 61 A. E. Hughes, N. Haque, S. A. Northey and S. Giddey, *Resources*, 2021, **10**, 93.
- 62 M. Ahmadi, S. M. Alavi and A. Larimi, *Inorg. Chem.*, 2023, **62**, 20372–20389.
- 63 D. Permporn, R. Khunphonoi, J. Wilamat, P. Khemthong, P. Chirawatkul, T. Butburee, W. Sangkhun, K. Wantala, N. Grisdanurak, J. Santatiwongchai, P. Hirunsit, W. Klysubun and M. D. G. de Luna, *Nanomaterials*, 2022, **12**, 474.
- 64 W. Gu, Y. Geng, S. Xiao, Z. Gao and W. Wei, *Sci. Total Environ.*, 2023, **904**, 167248.
- 65 International Platinum Group Metals Association, *The Life Cycle Assessment of Platinum Group Metals: Reference year 2022*, 2025.
- 66 X. Wang, Z. Wang, Y. Bai, L. Tan, Y. Xu, X. Hao, J. Wang, A. H. Mahadi, Y. Zhao, L. Zheng and Y.-F. Song, *J. Energy Chem.*, 2020, **46**, 1–7.
- 67 S. Cao, Y. Li, B. Zhu, M. Jaroniec and J. Yu, *J. Catal.*, 2017, **349**, 208–217.
- 68 Q. Zhu, T. Nan, X. Fan, S. Peng, J. Liu, S. Tang and J. Yang, *J. Environ. Chem. Eng.*, 2026, **14**, 121398.
- 69 R. Aromaa-Stubb, M. Rinne and M. Lundström, *J. Sustain. Metall.*, 2024, **10**, 1795–1806.
- 70 K. Bang, J. Jung, Y. Han and H. Song, *Bull. Korean Chem. Soc.*, 2025, **46**, 1028–1047.
- 71 R. Xiong, X. Ding, Y. Sun, F. Liu, Y. Xiao, B. Cheng and S. Lei, *Sep. Purif. Technol.*, 2025, **358**, 130469.
- 72 M. Mistry, J. Gediga and S. Boonzaier, *Int. J. Life Cycle Assess.*, 2016, **21**, 1559–1572.
- 73 N. Zahir, V. Rajangam, S. S. Kalanur, S. I. Nikitenko and B. G. Pollet, *Energy Environ. Mater.*, , DOI:10.1002/eem2.70014.
- 74 F. Wu, C. Zhou, Y. Tang, J. Han, W. Xing, G. Wu and Y. Huang, *Mol. Catal.*, 2025, **576**, 114940.
- 75 Z. Wang, F. Su, H. Cao, M. Tian, X. Li, H. Xie, X. Jin, Z. Li and X. Y. Kong, *Mol. Catal.*, 2024, **552**, 113685.
- 76 N. T. Nassar, D. Pineault, S. M. Allen, D. M. McCaffrey, A. J. Padilla, J. L. Brainard, M. Bayani, E. Shojaeddini, J. W. Ryter, S. Lincoln and E. Alonso, *Methodology and technical input for the 2025 U.S. List of Critical Minerals—*

*Assessing the potential effects of mineral commodity supply chain disruptions on the U.S. economy*, 2025, vol. 2025.

- 77 M. Cabrero-Antonino, B. Ferrer, H. G. Baldoví and S. Navalón, *Chem. Eng. J.*, 2022, **445**, 136426.
- 78 S. Ling, K. Tang, Y. Zheng, B. Su, X. Lin, X. F. Lu, Y. Hou, Z. Ding and S. Wang, *Trans. Tianjin Univ.* 2026, 2026, 1–10.
- 79 A. V. Müller, L. A. Faustino, K. T. De Oliveira, A. O. T. Patrocínio and A. S. Polo, *ACS Catal.*, 2023, **13**, 633–646.
- 80 K. Kamogawa, Y. Kato, Y. Tamaki, T. Noguchi, K. Nozaki, T. Nakagawa and O. Ishitani, *Chem. Sci.*, 2024, **15**, 2074–2088.
- 81 C. Shen, X. Meng, R. Zou, K. Sun, Q. Wu, Y. Pan and C. Liu, *Angew. Chemie Int. Ed.*, 2024, **63**, e202402369.
- 82 G. M. Olmez, F. B. Dilek, T. Karanfil and U. Yetis, *J. Clean. Prod.*, 2016, **130**, 195–201.
- 83 D. Wang, R. Huang, W. Liu, D. Sun and Z. Li, *ACS Catal.*, 2014, **4**, 4254–4260.
- 84 M. Khalil, J. Gunlazuardi, T. A. Ivandini and A. Umar, *Renew. Sustain. Energy Rev.*, 2019, **113**, 109246.
- 85 Y. N. Jing, X. L. Yin, L. L. Li, Y. L. Wang, J. Xue, Z. F. Xu, D. Q. Liu, C. W. Chen, X. J. Liu and E. K. Liu, *J. Colloid Interface Sci.*, 2024, **668**, 161–170.
- 86 Q. Lin, J. Zhao, P. Zhang, S. Wang, Y. Wang, Z. Zhang, N. Wen, Z. Ding, R. Yuan, X. Wang and J. Long, *Carbon Energy*, , DOI:10.1002/cey2.435.
